# Supplementary material for: Selective κ receptor partial agonist HS666 produces potent antinociception without inducing aversion after i.c.v. administration in mice
Source: PubMed Central journal article supplement (PMC5513865; doi:10.1111/bph.13854), 2017-06-27
Supplement: BPH-174-2444-s001.pdf [file BPH-174-2444-s001.pdf]

## Supporting Information

### **Selective $\kappa$ opioid receptor partial agonist HS666 produces potent antinociception without inducing aversion after i.c.v. administration in mice**

Mariana Spetea<sup>1,2</sup>, Shainnel O. Eans<sup>2,3</sup>, Michelle L. Ganno<sup>2</sup>, Aquilino Lantero<sup>1</sup>,  
Michael Mairegger<sup>1</sup>, Lawrence Toll<sup>2</sup>, Helmut Schmidhammer<sup>1</sup> and Jay P. McLaughlin<sup>2,3</sup>

<sup>1</sup>Department of Pharmaceutical Chemistry, Institute of Pharmacy and Center for Molecular Biosciences  
Innsbruck (CMBI), University of Innsbruck, Innsbruck, Austria

<sup>2</sup>Torrey Pines Institute for Molecular Studies, Port St. Lucie, FL, USA

<sup>3</sup>Department of Pharmacodynamics, University of Florida, Gainesville, FL, USA

#### **Corresponding authors**

Mariana Spetea

Department of Pharmaceutical Chemistry, Institute of Pharmacy and Center for Molecular Biosciences  
(CMBI), University of Innsbruck, Innrain 80-82, 6020 Innsbruck, Austria; Tel.: +43 512 507 58277; Fax:  
+43 512 507 58299; e-mail: Mariana.Spetea@uibk.ac.at

Jay P. McLaughlin

Department of Pharmacodynamics, University of Florida, Gainesville, FL 32610-0487, USA; Tel.: +1  
352 273 7207; Fax: +1 352 273 7705; e-mail: JMcLaughlin@cop.ufl.edu

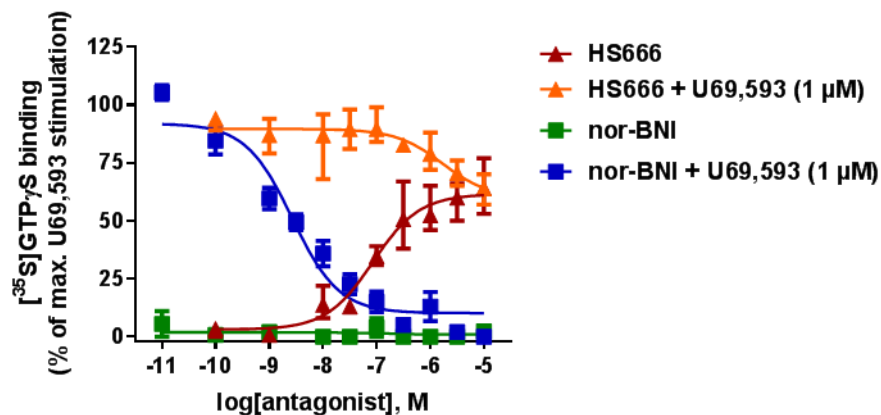

**Figure S1.** HS666 is a partial agonist for G protein activation in CHO-hKOR cells. [<sup>35</sup>S]GTP $\gamma$ S binding was determined using CHO-hKOR cell membranes following ligand treatment. Membranes were incubated with increasing concentrations of HS666 ( $n = 4$ ) or nor-BNI ( $n = 4$ ) in the presence or in the absence of U69,593 (1  $\mu$ M). The data were normalized to the maximum stimulation caused by U69,593 (100%). HS666 partially blocks U69,593-stimulated [<sup>35</sup>S]GTP $\gamma$ S coupling, whereas nor-BNI completely blocks coupling. Values are reported as the mean  $\pm$  SEM.

**Table S1. Antinociceptive potency of HS665, HS666 and U50,488 after i.c.v. administration in the 55°C warm-water tail-withdrawal assay**

| Time (min) | ED <sub>50</sub> and 95% C.I. (nmol, i.c.v.) <sup>a</sup> |                    |                    |
|------------|-----------------------------------------------------------|--------------------|--------------------|
|            | HS665                                                     | HS666              | U50,488            |
| 10         | 3.99 (3.14 – 5.33)                                        | 6.02 (4.51 – 8.08) | 8.94 (6.55 – 12.0) |
| 20         | 3.74 (2.98 – 4.78)                                        | 6.14 (4.82 – 7.86) | 8.31(5.47 – 12.0)  |
| 30         | 4.74 (3.72 – 6.41)                                        | not calculable     | 7.21 (4.02 – 11.1) |
| 40         |                                                           |                    | 9.56 (6.17 – 14.8) |
| 50         |                                                           |                    | 11.1 (7.83 –16.3)  |
| 60         |                                                           |                    | 14.2 (10.7 – 20.4) |

<sup>a</sup>Groups of C57Bl/6J mice ( $n \geq 8$  per group) were administered the respective compound, and evaluated in the 55°C warm-water tail-withdrawal assay. ED<sub>50</sub> and 95% confidence interval (C.I.) values were calculated using linear regression and are reported at different time points.

**Table S2. Analysis of bias comparing G protein signalling and  $\beta$ -arrestin2 requirement of HS665 and HS666 in comparison to U69,593 activity**

| Compound | $\log(\tau/K_A)$                                             |                                 | $\Delta\log(\tau/K_A)$ |                                 | $\Delta\Delta\log(\tau/K_A)$ | Bias factor |
|----------|--------------------------------------------------------------|---------------------------------|------------------------|---------------------------------|------------------------------|-------------|
|          | G protein <sup>a</sup>                                       | $\beta$ -arrestin2 <sup>b</sup> | G protein <sup>a</sup> | $\beta$ -arrestin2 <sup>b</sup> |                              |             |
| HS665    | 8.36 $\pm$ 0.16                                              | 4.96 $\pm$ 0.12                 | -2.21                  | 0.38                            | 2.59                         | 389         |
| HS666    | 5.73 $\pm$ 0.29                                              | 3.52 $\pm$ 0.02                 | -3.65                  | -1.86                           | 1.79                         | 62          |
| U69,593  | 7.98 $\pm$ 0.11 <sup>c</sup><br>7.59 $\pm$ 0.17 <sup>d</sup> | 7.17 $\pm$ 0.16                 | 0                      | 0                               | 0                            | 1           |

<sup>a</sup>Derived from the [<sup>35</sup>S]GTP $\gamma$ S binding assay with membranes from CHO cells stably expressing the human KOP receptor ( $n = 5$  independent experiments). <sup>b</sup>Derived from the PathHunter  $\beta$ -arrestin2 recruitment assay with U2OS cells co-expressing the human KOP receptor and the enzyme acceptor tagged  $\beta$ -arrestin2 fusion protein ( $n = 3$  independent experiments). <sup>c</sup>Value used for U69,53, when assessed in parallel with HS665 within each experiment. <sup>d</sup>Value used for U69,53, when assessed in parallel with HS666 within each experiment. Transduction coefficients ( $\log(\tau/K_A)$ , mean  $\pm$  SEM), and bias factors ( $\Delta\Delta\log(\tau/K_A)_{\text{G protein} - \beta\text{-arrestin2}}$ ) were calculated using the operational model.
